# Supplementary material for: Anticancer Drug-Incorporated Layered Double Hydroxide Nanohybrids and Their Enhanced Anticancer Therapeutic Efficacy in Combination Cancer Treatment
Source: Hindawi journal article supplement (doi:10.1155/2014/193401), 2014-01-01
Supplement: f1 [file 193401.f1.pdf]

Supporting information

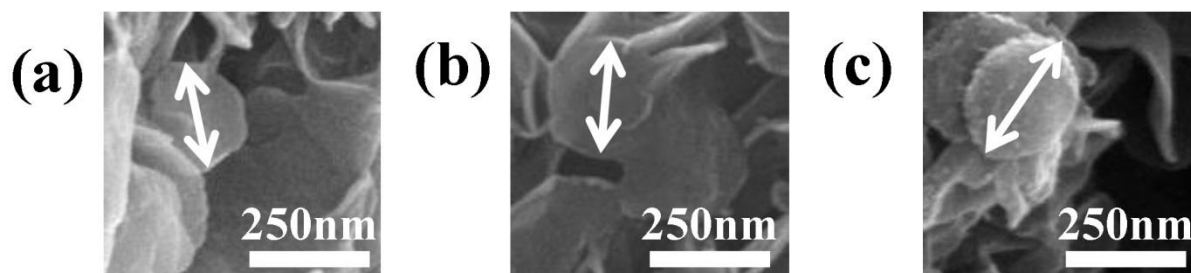

Fig. S1. Scanning electron microscopic images of primary particle of drug/LDH nanohybrid after reconstruction process (a) ML ( $\sim 225 \pm 14$  nm), (b) FL ( $\sim 236 \pm 12$  nm) and (c) MFL ( $\sim 234 \pm 14$  nm)

The lateral particle size of drug/LDH nanohybrid was investigated with the flattened particles. Randomly selected 10 particles from 3 different spots were utilized to obtain average and standard deviation. The lateral sizes of ML, FL and MFL were determined to be  $\sim 225 \pm 14$  nm,  $\sim 236 \pm 12$  nm and  $\sim 234 \pm 14$  nm, respectively. Compared to the lateral size of pristine LDH ( $\sim 233 \pm 12$ ) and calcined one ( $\sim 236 \pm 13$ ), those values are statistically considered same according to the student t-test with 95% confidentiality.

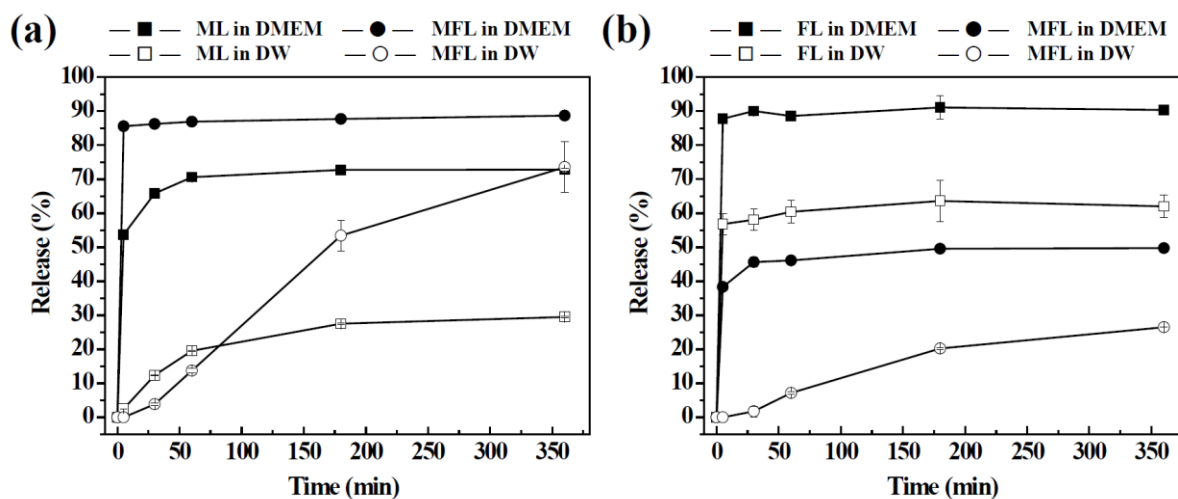

Fig. S2 Time-dependent drug release pattern from ML, FL and MFL hybrids in deionized water (DW) and DMEM cell culture media for (a) MTX (b) 5-FU

Time-dependent drug release pattern from ML, FL and MFL hybrids showed typical L-type curve. Drug release was more accelerated in DMEM compared with DW, which was attributed to the ion exchangeable electrolytes in DMEM media. Accumulated MTX release amounts at 6 h were ~ 70% and ~ 90% in DMEM from ML and MFL, respectively, suggesting that the incorporated drugs could be successfully release from the drug/LDH hybrids. 5-FU also showed accumulated release amounts of ~ 90% and ~ 50% in DMEM from FL and MFL hybrids, respectively, at 6 h. Interestingly, MTX release was more facilitated in MFL compared with ML; FL release was less in MFL than in FL. This might be attributed to the different location of MTX and 5-FU in MFL hybrids arising from different molecular dimension. The larger MTX molecules might be incorporated in the outer part of the hybrid, and thus the release was faster than 5-FU. As most of the drug moiety could be unloaded from the hybrids, the hybrids taken up by cancer cells could effectively transport drug molecules to intracellular system.
